# Supplementary material
Source: publisher site journal article supplement (https://www.dovepress.com/article/376897)

**Figure S1**

**Schematic of the study**


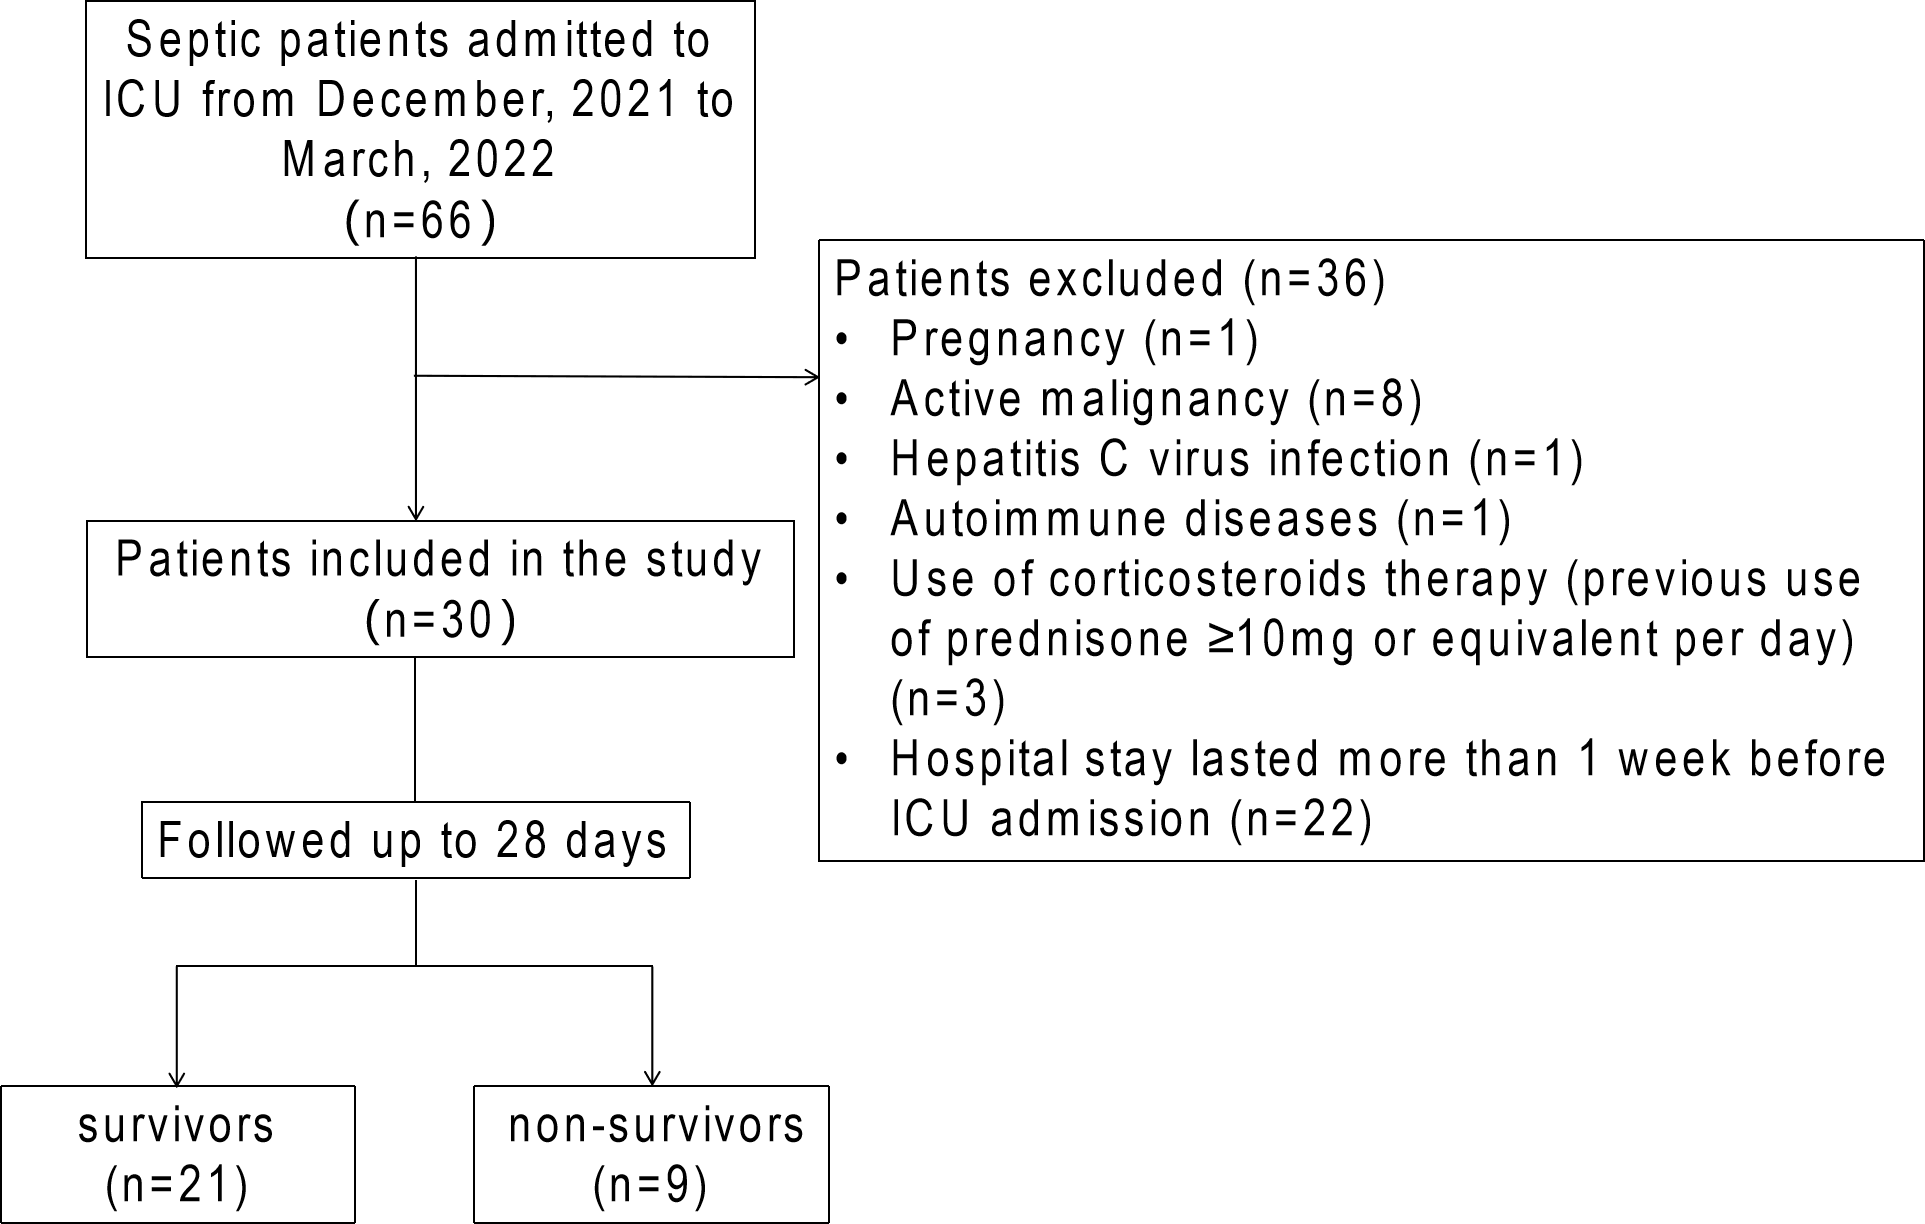


Figure S1 Schematic of the study

Supplement: Supplementary file 1 [file get_supplementary_file.php]
